# Supplementary material for: Dual Immune Checkpoint Blockade Induces Analogous Alterations in the Dysfunctional CD8+ T-cell and Activated Treg Compartment
Source: PubMed Central journal article supplement — Cancer Discov. 2023 Aug 7;13(10):2212–27. doi: 10.1158/2159-8290.CD-22-0851 (PMC10551666; doi:10.1158/2159-8290.cd-22-0851), 2023-08-07
Supplement: cd-22-0851_figure_s1_suppsf1.pdf [file cd-22-0851_figure_s1_suppsf1.pdf]

Figure S1

A

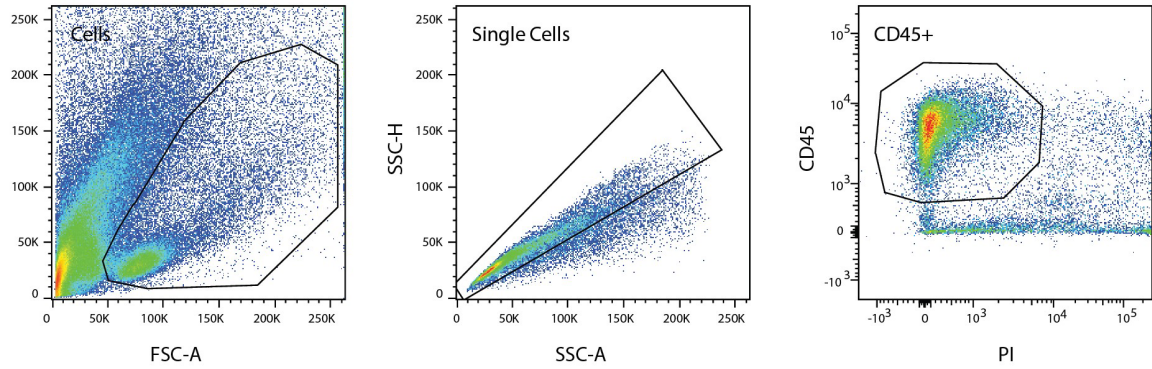

B

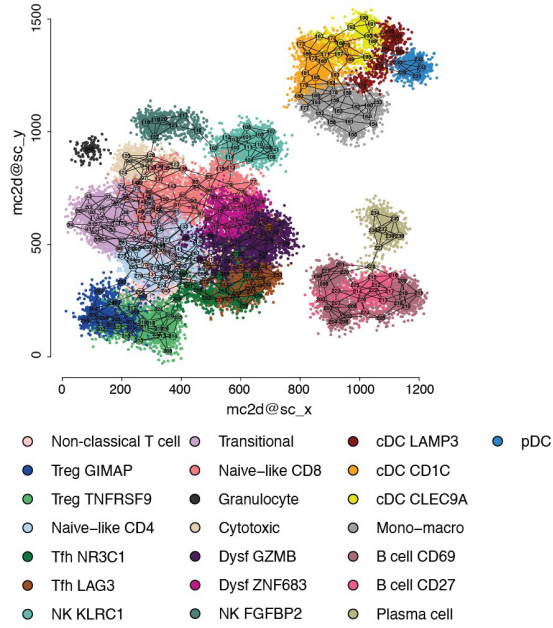

C

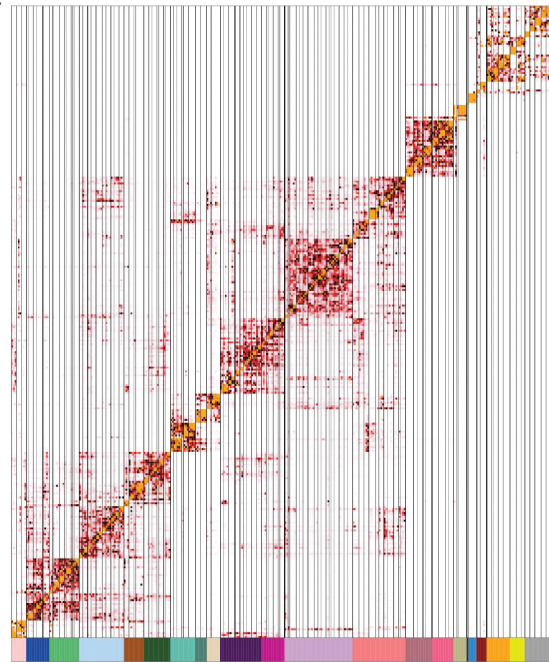

D

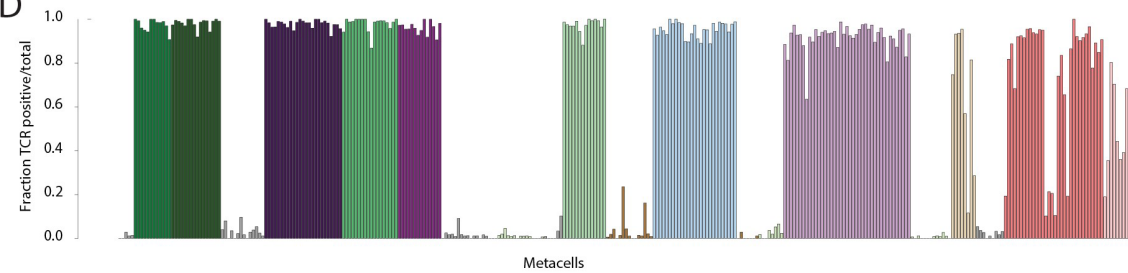

E

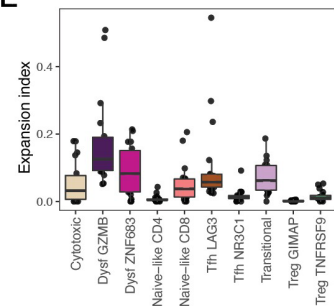

**Figure S1. Cell state annotations of CD45<sup>+</sup> cells and clonality of T cells isolated from HNSCC biopsies**

A) Gating strategy used for flow cytometry analysis and sorting of live CD45<sup>+</sup> cells from pre- and on treatment biopsies of 18 HNSCC patients. B) 2D projection of all cells from all patients as in Figure 1B, metacell numbers and edges between metacells are depicted, colored by cell states. C) Matrix of metacell correlations, in which groups of related metacells cluster together. Cell state annotations are shown by the color code, corresponding to the code used in Figure 1B and S1B. D) Detection of TCR sequences per metacell, colored by cell state. Fraction of cells for which a TCR was detected is shown for each metacell, distinguishing metacells that consist of ab T cells from metacells that (partly) consist of non(-classical) T cells. E) Quantification of clonal expansion in each cell state across all patients using the STARTRAC expansion index<sup>37</sup>. Boxes show the median and 25<sup>th</sup> and 75<sup>th</sup> percentiles. Whiskers depict 1.5 × interquartile range (IQR), and data points represent individual patients.
