# Supplementary material for: Dual Immune Checkpoint Blockade Induces Analogous Alterations in the Dysfunctional CD8+ T-cell and Activated Treg Compartment
Source: PubMed Central journal article supplement — Cancer Discov. 2023 Aug 7;13(10):2212–27. doi: 10.1158/2159-8290.CD-22-0851 (PMC10551666; doi:10.1158/2159-8290.cd-22-0851), 2023-08-07
Supplement: cd-22-0851_figure_s4_suppsf4.pdf [file cd-22-0851_figure_s4_suppsf4.pdf]

Figure S4

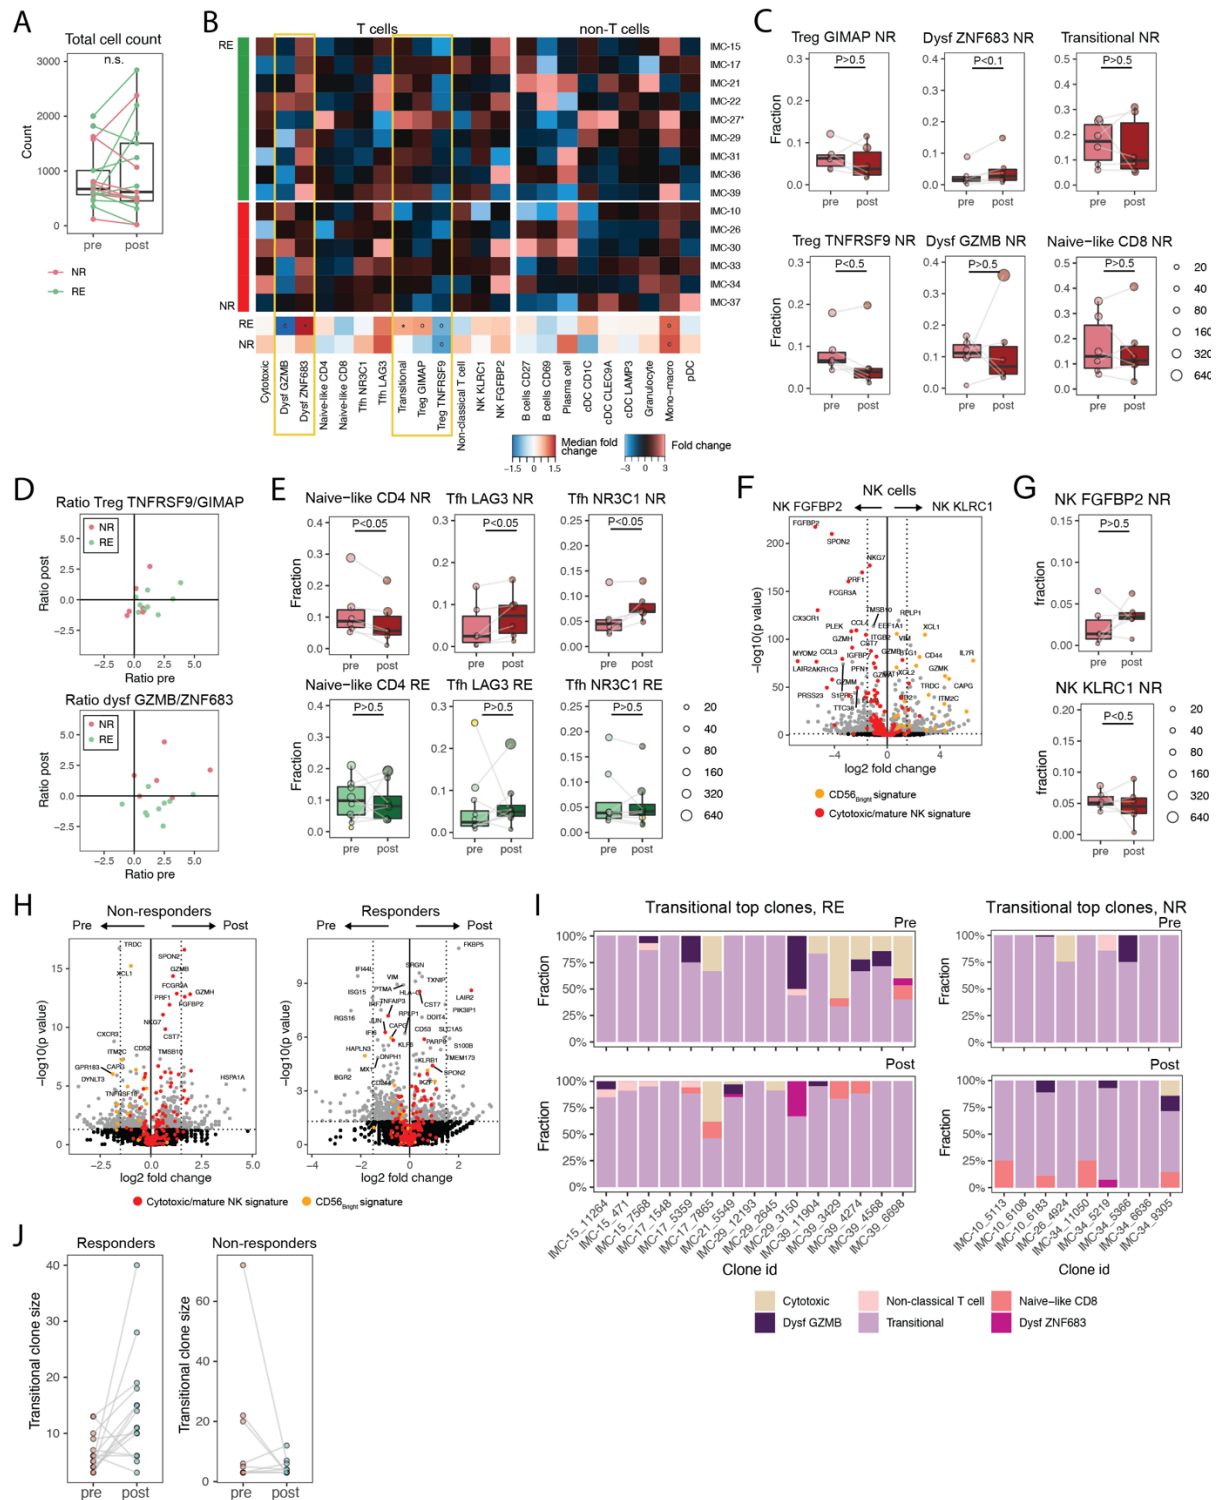

Figure S4. ICB-induced changes in immune cell state abundance and gene expression profiles

A) Quantification of the number of total immune cells in pre- and on-treatment biopsies of non-responding patients, depicted as absolute cell counts. Boxes show the median and 25<sup>th</sup> and 75<sup>th</sup> percentiles. Whiskers depict 1.5 × IQR, data points represent individual patients and are colored by

clinical response. A Paired Wilcoxon signed ranks test was performed (RE&NR:  $P=0.65$ , RE:  $P=0.76$ , NR:  $P=0.3$ ). B) Top: heatmap depicting changes in abundance of T cell states upon therapy in responding (green) and non-responding (red) patients. Log fold change of the fractions of each cell state in on-treatment versus pre-treatment biopsies, either in T cell or non-T cell compartment, are shown. Bottom: Heatmap depicting the median log fold changes of each cell state in responding and non-responding patients. Patient IMC-04, who received anti-PD-1 monotherapy, and patients for which matched data was lacking were excluded from analysis (IMC-38 and IMC-12). A two-tailed Mann–Whitney U test was performed between the pre- and on-treatment cell fractions. ( $^{\circ}p < 0.2$ ,  $*p < 0.05$ ).

C) Quantification of the abundance of Treg, CD8<sup>+</sup> dysfunctional, naïve-like CD8<sup>+</sup> T cell, and transitional T cell subsets in pre- and on-treatment biopsies of non-responding patients, depicted as fraction of total T cells. Patient IMC-04, who received anti-PD-1 monotherapy, and patients for which matched data was lacking were excluded from analysis (IMC-38 and IMC-12). Boxes show the median and 25<sup>th</sup> and 75<sup>th</sup> percentiles. Whiskers depict  $1.5 \times$  IQR and data points represent individual patients, sized by the number of cells that underlie that data point. A Paired Wilcoxon signed ranks test was performed.

D) Ratio between Treg<sub>TNFRSF9</sub> and Treg<sub>GIMAP</sub> (top panel), and CD8-dysf<sub>GZMB</sub> and CD8-dysf<sub>ZNF683</sub> (bottom panel) cells in pre- and on-treatment samples of responding and non-responding patients. The ratio of Treg<sub>TNFRSF9</sub>/Treg<sub>GIMAP</sub> and CD8-dysf<sub>GZMB</sub>/CD8-dysf<sub>ZNF683</sub> show a significant switch in pre- versus on-treatment samples in responders ( $P < 0.01$  and  $P < 0.01$ , respectively), while not in non-responders ( $P = 0.69$  and  $P = 0.56$ , respectively). Colors represent patient response. A Paired Wilcoxon signed ranks test was performed.

E) Abundance of Naïve-like CD4 T cells and Tfh cells in pre- and on-treatment biopsies of responding and non-responding patients. Patients for which matched data was lacking were excluded from analysis (IMC-38 and IMC-12), data points from IMC-27 are marked in yellow. Boxes, whiskers, size of data points as described in B. A Paired Wilcoxon signed ranks test was performed.

F) Differentially expressed genes between the NK<sub>FGFBP2</sub> and NK<sub>KLRC1</sub> cell subsets across all biopsies. Genes present in the cytotoxic (mature) NK cell signature and the less cytotoxic (CD56<sup>bright</sup>) signature<sup>33</sup> are highlighted in red and yellow, respectively. Mann Whitney U test with false detection

rate (FDR) correction was used to determine p-values. G) Abundance of NK cells in pre- and on-treatment biopsies of non-responding patients. Boxes, whiskers, size data points as described in B and D. A Paired Wilcoxon signed ranks test was performed. H) Differentially expressed genes in NK cells in pre- and on-treatment biopsies of non-responding and responding patients. Genes from the cytotoxic (mature) NK cell signature and from the less cytotoxic (CD56<sub>bright</sub>) signature are highlighted in red and yellow, respectively. Mann Whitney U test with false detection rate (FDR) correction was used to determine p-values. I) Composition of cell states of the top TCR clones in the transitional CD8<sup>+</sup> cell compartment in pre- and on-treatment biopsies of responding and non-responding patients. Colors represent cell state. J) Number of cells in top transitional CD8<sup>+</sup> T cell clones in pre- and on-treatment biopsies of responding and non-responding patients. A Paired Wilcoxon signed ranks test was performed.
